# Supplementary material
Source: Springer Nature journal article supplement (https://www.springermedizin.de/resource/supplementary/12884_2008_177_MOESM9_ESM.pdf/9459788)
Supplement: MOESM9 [file 9459788]

Papers reporting small for gestational age

Papers reporting pre-eclampsia

Quality Item

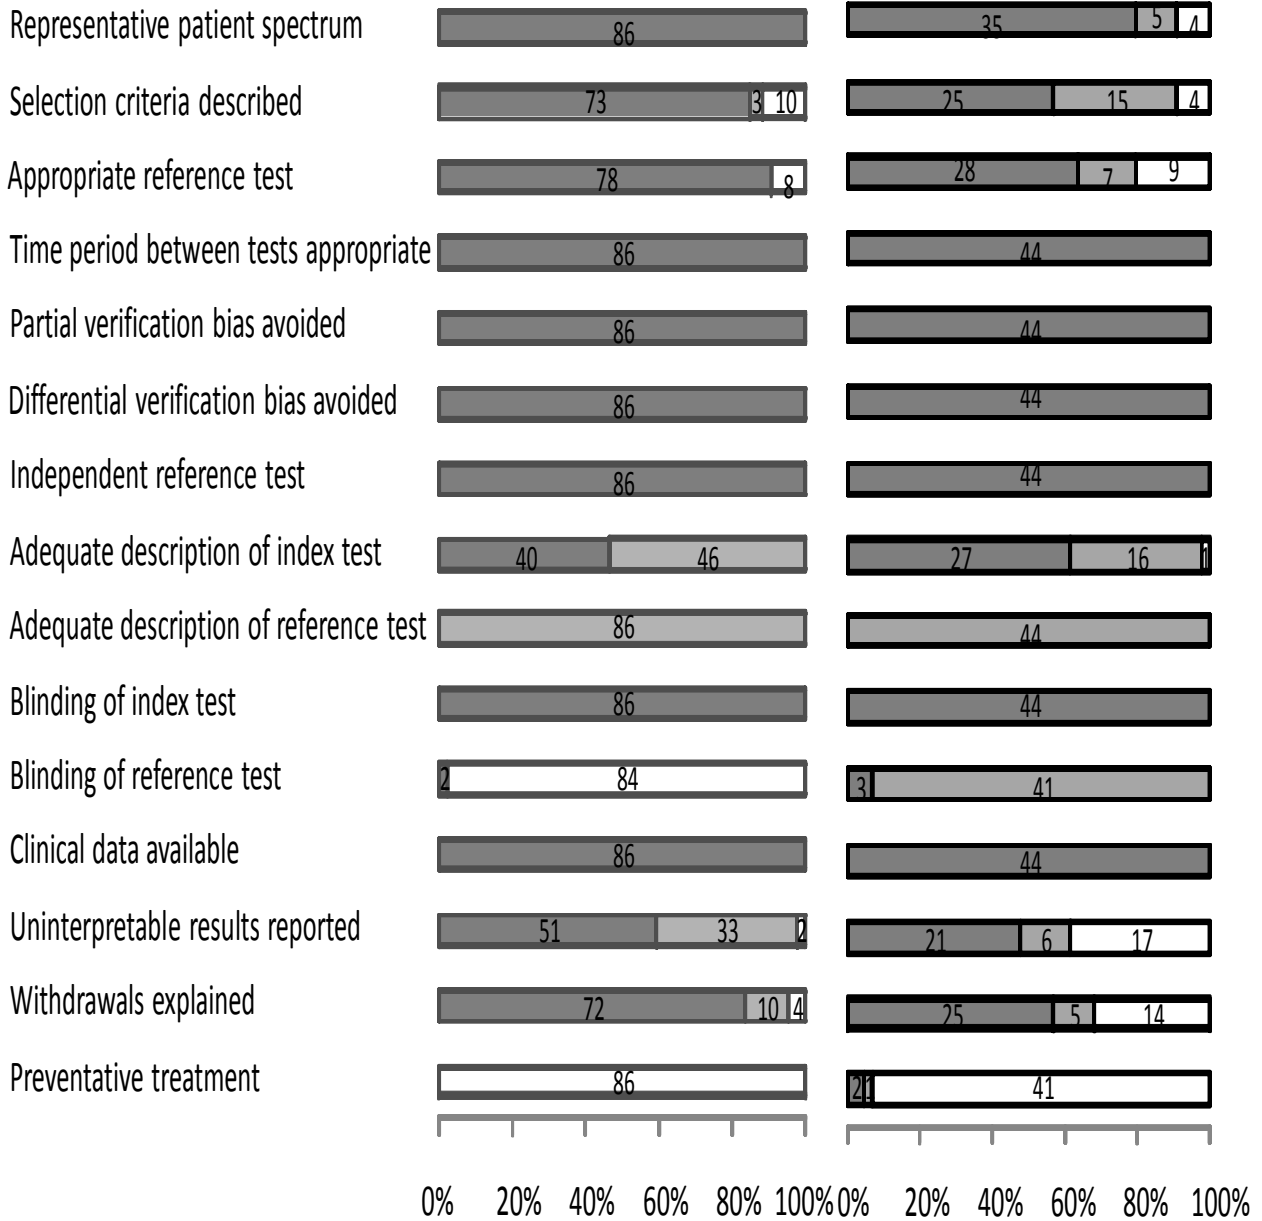

Compliance with quality item

■ Yes/NA   ■ No   □ Unclear
